# Supplementary material for: Sagan Dalya Tea, a New “Old” Probable Adaptogenic Drug: Metabolic Characterization and Bioactivity Potentials of Rhododendron adamsii Leaves
Source: MDPI journal article supplement (doi:10.3390/antiox10060863), 2021-05-27
Supplement: s1 [file s1]

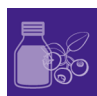

## Supplementary Material

# Sagan Dalya Tea, a New “Old” Probable Adaptogenic Drug: Metabolic Characterization and Bioactivity Potentials of *Rhododendron adamsii* Leaves

Daniil N. Olennikov <sup>1,\*</sup>, Vyacheslav M. Nikolaev <sup>2</sup> and Nadezhda K. Chirikova <sup>3</sup>

<sup>1</sup> Laboratory of Medical and Biological Research, Institute of General and Experimental Biology, Siberian Division, Russian Academy of Science, 6 Sakh'yanovoy Street, 670047 Ulan-Ude, Russia

<sup>2</sup> Department of the Adaptation Mechanisms Study, Yakutsk Scientific Center of Complex Medical Problems, 6/3 Yaroslavsky Street, 677000 Yakutsk, Russia; nikolaev1126@mail.ru

<sup>3</sup> Department of Biology, Institute of Natural Sciences, North-Eastern Federal University, 58 Belinsky Street, 677027 Yakutsk, Russia; hofnung@mail.ru

## Content

**Table S1.** Reference standards used for the qualitative and quantitative analysis by HPLC-DAD-ESI-tQ-MS and HPLC-UV assays.

**Table S2.** Regression equations, correlation coefficients, standard deviation, limits of detection, limits of quantification and linear ranges for 55 reference standards.

**Table S3.** Retention times, UV- and ESI-MS spectral data of compounds 1–171 found in *Rhododendron adamsii*

**Table S4.** UV-spectral patterns of compounds found in *R. adamsii*.

**Figure S1.** High-performance anion-exchange chromatography with photodiode detection chromatograms of free carbohydrates of *Rhododendron adamsii* leaves and reference standards.

**Figure S2.** High-performance liquid chromatography with photodiode detection chromatograms of triterpenic acids of *R. adamsii* leaves and reference standards.

**Figure S3.** HPLC-PDA chromatograms of ether and methanolic extracts of fresh *R. adamsii* leaves.

**Figure S4.** Yield of ether extract from *R. adamsii* leaves collected in various months.

**Citation:** Olennikov, D.N.; Nikolaev, V.M.; Chirikova, N.K. Sagan Dalya Tea, a New “Old” Probable Adaptogenic Drug: Metabolic Characterization and Bioactivity Potentials of *Rhododendron adamsii* Leaves. *Antioxidants* **2021**, *10*, 863.  
<https://doi.org/10.3390/antiox10060863>

Received: 16 May 2021  
Accepted: 26 May 2021  
Published: 27 May 2021

**Publisher's Note:** MDPI stays neutral with regard to jurisdictional claims in published maps and institutional affiliations.

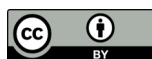

**Copyright:** © 2021 by the authors. Licensee MDPI, Basel, Switzerland. This article is an open access article distributed under the terms and conditions of the Creative Commons Attribution (CC BY) license (<http://creativecommons.org/licenses/by/4.0/>).

**Table S1.** Reference standards used for the qualitative and quantitative analysis by HPLC-DAD-ESI-tQ-MS and HPLC-UV assays.

| No  | Compound                                         | Purity (≥), % | Manufacturer (cat. No)* | Used for analysis (compound No in Table 2)                                                            |
|-----|--------------------------------------------------|---------------|-------------------------|-------------------------------------------------------------------------------------------------------|
| 3   | Malic acid                                       | 99            | Sigma (W265501)         | 3                                                                                                     |
| 4   | Citric acid                                      | 99            | Sigma (251275)          | 4                                                                                                     |
| 5   | Tartaric acid                                    | 99            | Sigma (W304401)         | 5                                                                                                     |
| 6   | Succinic acid                                    | 99            | Sigma (W471920)         | 6                                                                                                     |
| 7   | Fumaric acid                                     | 99            | Sigma (47910)           | 7                                                                                                     |
| 10  | Phlorin (phloroglucinol <i>O</i> -glucoside)     | 90            | Sigma (PHL85690)        | 8, 9, 10, 11, 12, 13, 14                                                                              |
| 17  | Arbutin (hydroquinone <i>O</i> -glucoside)       | 98            | Sigma (A4256)           | 15, 16, 17, 19, 20                                                                                    |
| 21  | Sakakin (orcinol <i>O</i> -glucoside)            | 90            | Sigma (PHL83267)        | 18, 21, 24                                                                                            |
| 45  | Dihydroquercetin 3- <i>O</i> -rhamnoside         | 95            | Sigma (PHL80356)        | 42, 43, 44, 45, 102, 109, 112, 113                                                                    |
| 50  | Myricetin 3- <i>O</i> -rutinoside                | 98            | Wuhan (TBW01950)        | 50                                                                                                    |
| 51  | Myricetin 3- <i>O</i> -galactoside               | 85            | Sigma (SML00249)        | 51                                                                                                    |
| 52  | Isomyricitrin (myricetin 3- <i>O</i> -glucoside) | 99            | Extrasynthese (1357S)   | 36, 37, 46, 47, 49, 56, 91, 92, 93, 94, 97, 99, 106, 107, 108, 111, 118, 119, 165, 166, 167, 168, 169 |
| 53  | Rutin (quercetin 3- <i>O</i> -rutinoside)        | 95            | Sigma (R2303)           | 53                                                                                                    |
| 54  | Hyperoside (quercetin 3- <i>O</i> -galactoside)  | 98            | Extrasynthese (1027S)   | 54                                                                                                    |
| 55  | Isoquercitrin (quercetin 3- <i>O</i> -glucoside) | 98            | Sigma (16654)           | 38, 48, 100, 101, 103, 104, 110, 114, 115, 121, 122                                                   |
| 57  | Avicularin (quercetin 3- <i>O</i> -arabinoside)  | 95            | Sigma (75759)           | 57                                                                                                    |
| 58  | Myricitrin (myricetin 3- <i>O</i> -rhamnoside)   | 99            | Sigma (91255)           | 58                                                                                                    |
| 59  | Quercitrin (quercetin 3- <i>O</i> -rhamnoside)   | 98            | Sigma (740580)          | 59                                                                                                    |
| 60  | Juglanin (kaempferol 3- <i>O</i> -arabinoside)   | 95            | MCE (HYN3433)           | 60                                                                                                    |
| 61  | Afzelin (kaempferol 3- <i>O</i> -rhamnoside)     | 98            | Sigma (PHL83864)        | 61                                                                                                    |
| 62  | Dihydroquercetin (taxifolin)                     | 95            | Sigma (PHL89284)        | 62                                                                                                    |
| 63  | Phloretin                                        | 99            | Sigma (P7912)           | 63                                                                                                    |
| 64  | Dihydrokaempferol (aromadendrin)                 | 95            | Sigma (SMB00175)        | 64                                                                                                    |
| 65  | Myricetin                                        | 96            | Sigma (70050)           | 65                                                                                                    |
| 66  | Quercetin                                        | 95            | Sigma (Q4951)           | 66                                                                                                    |
| 67  | Luteolin                                         | 98            | Sigma (L9283)           | 67                                                                                                    |
| 68  | Apigenin                                         | 95            | Sigma (10798)           | 68                                                                                                    |
| 69  | Isorhamnetin                                     | 95            | Sigma (17794)           | 69                                                                                                    |
| 73  | Kaempferol                                       | 99            | Extrasynthese (1124S)   | 73                                                                                                    |
| 74  | Farrerol                                         | 99            | MCE (HYN0344)           | 74                                                                                                    |
| 86  | 1- <i>O</i> -Caffeoylquinic acid                 | 98            | ChemFaces (CFN99121)    | 86                                                                                                    |
| 89  | Vanillic acid 4- <i>O</i> -glucoside             | 98            | ChemFaces (CFN95257)    | 89                                                                                                    |
| 95  | 5- <i>O</i> -Caffeoylquinic acid                 | 95            | Sigma (C3878)           | 95                                                                                                    |
| 96  | 3- <i>O</i> -Caffeoylquinic acid                 | 98            | Sigma (94419)           | 96                                                                                                    |
| 98  | 4- <i>O</i> -Caffeoylquinic acid                 | 98            | Sigma (65969)           | 98                                                                                                    |
| 105 | Miquelianin (quercetin 3- <i>O</i> -glucuronide) | 90            | Sigma (90733)           | 105                                                                                                   |
| 120 | Cannabigerorcinic acid                           | 98            | Cayman (23258)          | 70, 71, 72, 75, 76, 77, 78, 79, 80, 81, 82, 83, 120, 116, 117, 123, 124, 129                          |
| 137 | Grifolic acid                                    | 98            | ChemFaces (CFN97284)    | 125, 126, 127, 128, 130, 131, 132, 137, 138, 139, 140                                                 |
| 141 | Daurichromenic acid                              | 98            | ChemFaces (CFN97302)    | 133, 134, 135, 136, 141, 141, 142, 143, 144, 145                                                      |
| 148 | Gallic acid                                      | 97            | Sigma (G7384)           | 146, 147, 148, 149, 150, 151                                                                          |
| 151 | Gallic acid <i>O</i> -methyl ester               | 98            | Sigma (274194)          | 151                                                                                                   |
| 154 | Procyanidin B <sub>1</sub>                       | 90            | Extrasynthese (0983)    | 154                                                                                                   |
| 155 | Catechin                                         | 99            | Extrasynthese (0976S)   | 152, 153, 155, 157                                                                                    |

Table S1. Cont.

| No  | Compound                                | Purity (≥), % | Manufacturer (cat. No)* | Used for analysis (compound No in Table 2)         |
|-----|-----------------------------------------|---------------|-------------------------|----------------------------------------------------|
| 158 | Procyanidin B <sub>2</sub>              | 90            | Sigma (PHL89552)        | 158                                                |
| 159 | Epicatechin                             | 99            | Extrasynthese (0977S)   | 159                                                |
| 160 | Procyanidin C <sub>1</sub>              | 90            | Extrasynthese (0988)    | 160                                                |
| 161 | Catechin 3-O-gallate                    | 98            | Extrasynthese (0972S)   | 156, 161, 162                                      |
| 164 | Epicatechin 3-O-gallate                 | 97.5          | Extrasynthese (0978S)   | 164                                                |
| 170 | Quercetin 3-O-(6''-O-galloyl)-glucoside | 98            | ChemFaces (CFN91064)    | 170, 171                                           |
|     | Saccharose                              | 99            | Sigma (S7903)           | 1                                                  |
|     | Glucose                                 | 99            | Sigma (49161)           | 2                                                  |
|     | Ursolic acid                            | 90            | Sigma (216753)          | 22, 23, 25, 26, 27, 28, 29, 30, 31, 32, 33, 34, 35 |
|     | Dihydromyricetin                        | 98            | Sigma (SML0295)         | 39, 40, 41                                         |
|     | Protocatechuic acid                     | 97            | Sigma (37580)           | 84, 85                                             |
|     | Vanillic acid                           | 97            | Sigma (H36001)          | 88, 89, 90                                         |

\* Manufacturers list: Cayman—Cayman Chemicals (Ann Arbor, MI, USA); ChemFaces—ChemFaces (Wuhan, Hubei, PRC); Extrasynthese—Extrasynthese (Lyon, France); MCE—MCE Med Chem Express (Monmouth, NJ, USA); Sigma—Sigma-Aldrich (St. Louis, MO, USA); Wuhan—Wuhan Chem Norm Biotech Co., Ltd. (Wuhan, PRC).

**Table S2.** Regression equations, correlation coefficients ( $r^2$ ), standard deviation ( $S_{yx}$ ), limits of detection (LOD), limits of quantification (LOQ) and linear ranges for 55 reference standards.

| Compound                                         | Ionization <sup>a</sup> | CE <sup>b</sup><br>(eV) | Regression equation <sup>c</sup> |                | $r^2$  | $S_{yx}$              | LOD/<br>LOQ<br>( $\mu\text{g/mL}$ ) | Linear range<br>( $\mu\text{g/mL}$ ) |
|--------------------------------------------------|-------------------------|-------------------------|----------------------------------|----------------|--------|-----------------------|-------------------------------------|--------------------------------------|
|                                                  |                         |                         | $a$                              | $b \cdot 10^6$ |        |                       |                                     |                                      |
| 1- <i>O</i> -Caffeoylquinic acid                 | N                       | -15                     | 2.5394                           | -1.2360        | 0.9994 | $0.45 \cdot 10^{-2}$  | 0.006/0.02                          | 0.02–300.0                           |
| 3- <i>O</i> -Caffeoylquinic acid                 | N                       | -15                     | 2.4176                           | -1.5647        | 0.9994 | $0.40 \cdot 10^{-2}$  | 0.005/0.02                          | 0.02–300.0                           |
| 4- <i>O</i> -Caffeoylquinic acid                 | N                       | -15                     | 2.7365                           | -1.0690        | 0.9996 | $0.51 \cdot 10^{-2}$  | 0.006/0.02                          | 0.02–300.0                           |
| 5- <i>O</i> -Caffeoylquinic acid                 | N                       | -15                     | 2.9021                           | -1.4184        | 0.9998 | $0.39 \cdot 10^{-2}$  | 0.004/0.01                          | 0.02–300.0                           |
| Afzelin (kaempferol 3- <i>O</i> -rhamnoside)     | N                       | -20                     | 2.0859                           | -0.9171        | 0.9980 | $6.18 \cdot 10^{-2}$  | 0.03/0.09                           | 0.10–100.0                           |
| Apigenin                                         | N                       | -15                     | 5.8022                           | -0.8040        | 0.9990 | $1.14 \cdot 10^{-2}$  | 0.007/0.02                          | 0.02–500.0                           |
| Arbutin (hydroquinone <i>O</i> -glucoside)       | N                       | -10                     | 0.1756                           | -0.0144        | 0.9967 | $3.01 \cdot 10^{-2}$  | 0.56/1.71                           | 2.00–850.0                           |
| Avicularin (quercetin 3- <i>O</i> -arabinoside)  | N                       | -20                     | 1.4412                           | -0.6211        | 0.9930 | $11.25 \cdot 10^{-2}$ | 0.26/0.78                           | 0.80–100.0                           |
| Cannabigerorcinic acid                           | N                       | -15                     | 1.1123                           | -1.0289        | 0.9862 | $0.41 \cdot 10^{-2}$  | 0.01/0.04                           | 0.05–400.0                           |
| Catechin                                         | N                       | -20                     | 0.9562                           | -0.0521        | 0.9971 | $7.79 \cdot 10^{-2}$  | 0.27/0.82                           | 0.90–100.0                           |
| Catechin 3- <i>O</i> -gallate                    | N                       | -20                     | 1.3387                           | -0.0284        | 0.9981 | $9.50 \cdot 10^{-2}$  | 0.23/0.71                           | 0.80–100.0                           |
| Citric acid                                      | N                       | -10                     | 0.9518                           | -0.0267        | 0.9990 | $1.03 \cdot 10^{-2}$  | 0.03/0.10                           | 0.10–100.0                           |
| Daurichromenic acid                              | N                       | -30                     | 1.1269                           | -0.9560        | 0.9864 | $0.93 \cdot 10^{-2}$  | 0.02/0.08                           | 0.10–400.0                           |
| Dihydrokaempferol (aromadendrin)                 | N                       | -15                     | 3.6748                           | -0.7069        | 0.9987 | $0.90 \cdot 10^{-2}$  | 0.008/0.02                          | 0.02–400.0                           |
| Dihydromyricetin                                 | N                       | -15                     | 4.9634                           | -0.5047        | 0.9972 | $0.63 \cdot 10^{-2}$  | 0.004/0.01                          | 0.01–400.0                           |
| Dihydroquercetin (taxifolin)                     | N                       | -15                     | 4.1069                           | -0.5637        | 0.9989 | $0.77 \cdot 10^{-2}$  | 0.006/0.02                          | 0.02–400.0                           |
| Dihydroquercetin 3- <i>O</i> -rhamnoside         | N                       | -20                     | 2.5078                           | -0.6342        | 0.9991 | $0.96 \cdot 10^{-2}$  | 0.01/0.03                           | 0.04–400.0                           |
| Epicatechin                                      | N                       | -20                     | 1.0828                           | -0.0456        | 0.9973 | $6.85 \cdot 10^{-2}$  | 0.21/0.63                           | 0.70–100.0                           |
| Epicatechin 3- <i>O</i> -gallate                 | N                       | -20                     | 1.5152                           | -0.0523        | 0.9979 | $12.67 \cdot 10^{-2}$ | 0.28/0.84                           | 0.90–100.0                           |
| Farrerol                                         | N                       | -10                     | 6.3710                           | -0.9634        | 0.9985 | $0.92 \cdot 10^{-2}$  | 0.004/0.01                          | 0.02–400.0                           |
| Fumaric acid                                     | N                       | -10                     | 0.8615                           | -0.0364        | 0.9982 | $2.03 \cdot 10^{-2}$  | 0.03/0.07                           | 0.10–100.0                           |
| Gallic acid                                      | N                       | -10                     | 2.6538                           | -0.1376        | 0.9990 | $1.17 \cdot 10^{-2}$  | 0.01/0.04                           | 0.10–100.0                           |
| Gallic acid <i>O</i> -methyl ester               | N                       | -15                     | 1.9478                           | -0.2369        | 0.9984 | $1.03 \cdot 10^{-2}$  | 0.02/0.05                           | 0.05–250.0                           |
| Glucose                                          | N                       | -10                     | 1.5632                           | -0.0376        | 0.9983 | $5.14 \cdot 10^{-2}$  | 0.11/0.33                           | 0.40–100.0                           |
| Grifolic acid                                    | N                       | -25                     | 1.0627                           | -1.2531        | 0.9893 | $0.62 \cdot 10^{-2}$  | 0.02/0.06                           | 0.10–400.0                           |
| Hyperoside (quercetin 3- <i>O</i> -galactoside)  | N                       | -20                     | 1.4689                           | -0.3641        | 0.9990 | $5.69 \cdot 10^{-2}$  | 0.12/0.38                           | 0.40–400.0                           |
| Isomyricitrin (myricetin 3- <i>O</i> -glucoside) | N                       | -20                     | 2.6340                           | -0.2411        | 0.9973 | $2.74 \cdot 10^{-2}$  | 0.03/0.10                           | 0.10–350.0                           |
| Isoquercitrin (quercetin 3- <i>O</i> -glucoside) | N                       | -20                     | 1.8267                           | -0.4160        | 0.9990 | $11.73 \cdot 10^{-2}$ | 0.21/0.67                           | 0.70–400.0                           |
| Isorhamnetin                                     | N                       | -15                     | 1.1541                           | -0.4691        | 0.9987 | $1.06 \cdot 10^{-2}$  | 0.03/0.10                           | 0.10–350.0                           |
| Juglanin (kaempferol 3- <i>O</i> -arabinoside)   | N                       | -20                     | 2.0384                           | -0.3640        | 0.9975 | $2.02 \cdot 10^{-2}$  | 0.03/0.10                           | 0.10–350.0                           |
| Kaempferol                                       | N                       | -10                     | 1.2416                           | -0.3615        | 0.9901 | $3.02 \cdot 10^{-2}$  | 0.08/0.24                           | 0.3–100.0                            |
| Luteolin                                         | N                       | -15                     | 7.064                            | -1.533         | 0.9992 | $1.92 \cdot 10^{-2}$  | 0.009/0.03                          | 0.03–500.0                           |
| Malic acid                                       | N                       | -10                     | 0.9911                           | -0.0379        | 0.9988 | $2.05 \cdot 10^{-2}$  | 0.07/0.21                           | 0.3–100.0                            |
| Miquelianin (quercetin 3- <i>O</i> -glucuronide) | N                       | -20                     | 1.6705                           | -0.4374        | 0.9988 | $12.79 \cdot 10^{-2}$ | 0.25/0.77                           | 0.8–100.0                            |
| Myricetin                                        | N                       | -15                     | 0.9375                           | -0.7631        | 0.9982 | $1.42 \cdot 10^{-2}$  | 0.05/0.15                           | 0.20–350.0                           |
| Myricetin 3- <i>O</i> -galactoside               | N                       | -20                     | 2.4751                           | -0.2081        | 0.9976 | $2.04 \cdot 10^{-2}$  | 0.03/0.10                           | 0.10–350.0                           |

Table S2. Cont.

| Compound                                                  | Ionization <sup>a</sup> | CE <sup>b</sup><br>(eV) | Regression equation <sup>c</sup> |                | $r^2$  | $S_{YX}$              | LOD/<br>LOQ<br>( $\mu\text{g/mL}$ ) | Linear range<br>( $\mu\text{g/mL}$ ) |
|-----------------------------------------------------------|-------------------------|-------------------------|----------------------------------|----------------|--------|-----------------------|-------------------------------------|--------------------------------------|
|                                                           |                         |                         | $a$                              | $b \cdot 10^6$ |        |                       |                                     |                                      |
| Myricetin 3- <i>O</i> -rutinoside                         | N                       | -25                     | 1.9634                           | -0.7458        | 0.9963 | $2.59 \cdot 10^{-2}$  | 0.04/0.14                           | 0.20–350.0                           |
| Myricitrin (myricetin 3- <i>O</i> -rhamnoside)            | N                       | -20                     | 1.8233                           | -0.7962        | 0.9975 | $2.02 \cdot 10^{-2}$  | 0.04/0.11                           | 0.20–350.0                           |
| Phloretin                                                 | N                       | -15                     | 2.0330                           | -0.2516        | 0.9992 | $1.09 \cdot 10^{-2}$  | 0.02/0.05                           | 0.05–300.0                           |
| Phlorin (phloroglucinol <i>O</i> -glucoside)              | N                       | -10                     | 0.1537                           | -0.0189        | 0.9960 | $3.83 \cdot 10^{-2}$  | 0.82/2.49                           | 2.50–850.0                           |
| Procyanidin B <sub>1</sub>                                | N                       | -30                     | 1.3722                           | -0.0829        | 0.9973 | $9.93 \cdot 10^{-2}$  | 0.24/0.72                           | 0.80–100.0                           |
| Procyanidin B <sub>2</sub>                                | N                       | -30                     | 1.3620                           | -0.0820        | 0.9961 | $9.91 \cdot 10^{-2}$  | 0.21/0.72                           | 0.80–100.0                           |
| Procyanidin C <sub>1</sub>                                | N                       | -20                     | 1.0634                           | -0.0933        | 0.9902 | $10.01 \cdot 10^{-2}$ | 0.31/0.94                           | 1.00–100.0                           |
| Protocatechuic acid                                       | N                       | -10                     | 1.9610                           | -0.5271        | 0.9993 | $0.94 \cdot 10^{-2}$  | 0.02/0.05                           | 0.05–250.0                           |
| Quercetin                                                 | N                       | -15                     | 1.1105                           | -0.3211        | 0.9937 | $4.18 \cdot 10^{-2}$  | 0.12/0.38                           | 0.40–400.0                           |
| Quercetin 3- <i>O</i> -(6''- <i>O</i> -galloyl)-glucoside | N                       | -25                     | 1.1492                           | -0.6010        | 0.9980 | $4.68 \cdot 10^{-2}$  | 0.14/0.41                           | 0.50–400.0                           |
| Quercitrin (quercetin 3- <i>O</i> -rhamnoside)            | N                       | -20                     | 1.9871                           | -0.6871        | 0.9984 | $5.63 \cdot 10^{-2}$  | 0.09/0.28                           | 0.40–400.0                           |
| Rutin (quercetin 3- <i>O</i> -rutinoside)                 | N                       | -20                     | 1.2716                           | -0.7389        | 0.9897 | $9.14 \cdot 10^{-2}$  | 0.23/0.72                           | 0.80–400.0                           |
| Sucrose                                                   | N                       | -10                     | 1.6278                           | -0.0428        | 0.9990 | $7.11 \cdot 10^{-2}$  | 0.14/0.44                           | 0.50–100.0                           |
| Sakakin (orcinol <i>O</i> -glucoside)                     | N                       | -10                     | 0.2569                           | -0.0316        | 0.9973 | $2.52 \cdot 10^{-2}$  | 0.33/1.00                           | 1.00–750.0                           |
| Succinic acid                                             | N                       | -10                     | 1.4611                           | -0.0731        | 0.9982 | $4.08 \cdot 10^{-2}$  | 0.09/0.27                           | 0.30–100.0                           |
| Tartaric acid                                             | N                       | -10                     | 1.5330                           | -0.0863        | 0.9985 | $4.15 \cdot 10^{-2}$  | 0.09/0.27                           | 0.30–100.0                           |
| Ursolic acid                                              | N                       | -20                     | 2.6370                           | -0.5733        | 0.9952 | $2.85 \cdot 10^{-2}$  | 0.03/0.11                           | 0.20–250.0                           |
| Vanillic acid                                             | N                       | -10                     | 1.5379                           | -0.6220        | 0.9990 | $0.99 \cdot 10^{-2}$  | 0.02/0.06                           | 0.10–250.0                           |
| Vanillic acid 4- <i>O</i> -glucoside                      | N                       | -15                     | 1.0864                           | -0.5271        | 0.9983 | $1.04 \cdot 10^{-2}$  | 0.03/0.10                           | 0.10–500.0                           |

<sup>a</sup> Ionization mode : N—negative. <sup>b</sup> CE—collision energy. <sup>c</sup> Regression equation:  $y = a \cdot x + b$ .

**Table S3.** Retention times ( $t_R$ ), UV- and ESI-MS spectral data of compounds **1–171** found in *Rhododendron adamsii*.

| No | $t_R$ (min) <sup>a</sup> | Compound <sup>b</sup>                                          | UV pattern <sup>c</sup> | CE (eV) <sup>d</sup> | ESI-MS ( $m/z$ )                |                                               | Adduct ions |
|----|--------------------------|----------------------------------------------------------------|-------------------------|----------------------|---------------------------------|-----------------------------------------------|-------------|
|    |                          |                                                                |                         |                      | [M-H] <sup>-</sup> <sup>e</sup> | MS/MS ( $I$ , %) <sup>f</sup>                 |             |
| 1  | 0.62 <sup>1</sup>        | O-Hexosyl-hexose <sup>L</sup> [26]                             | Nil                     | -10                  | 341                             |                                               |             |
| 2  | 0.76 <sup>1</sup>        | Hexose <sup>L</sup> [26]                                       | Nil                     | -10                  | 179                             |                                               |             |
| 3  | 0.92 <sup>1</sup>        | Malic acid <sup>R</sup> [26,29]                                | Nil                     | -10                  | 133                             |                                               |             |
| 4  | 1.05 <sup>1</sup>        | Citric acid <sup>R</sup> [26,29]                               | Nil                     | -10                  | 191                             |                                               |             |
| 5  | 1.26 <sup>1</sup>        | Tartaric acid <sup>R</sup> [26,29]                             | Nil                     | -10                  | 149                             |                                               |             |
| 6  | 1.42 <sup>1</sup>        | Succinic acid <sup>R</sup> [26,29]                             | Nil                     | -10                  | 117                             |                                               |             |
| 7  | 1.51 <sup>1</sup>        | Fumaric acid <sup>R</sup> [26,29]                              | Nil                     | -10                  | 115                             |                                               |             |
| 8  | 2.48 <sup>1</sup>        | Phloroglucinol di-O-hexoside <sup>L</sup> [44]                 | PGL                     | -10                  | 449                             | [449]: 287 (12), 125 (100)                    |             |
| 9  | 2.67 <sup>1</sup>        | Phloroglucinol di-O-hexoside <sup>L</sup> [44]                 | PGL                     | -10                  | 449                             | [449]: 287 (12), 125 (100)                    |             |
| 10 | 2.75 <sup>1</sup>        | Phlorin (phloroglucinol O-glucoside) <sup>R</sup> [44]         | PGL                     | -10                  | 287                             | [287]: 125                                    |             |
| 11 | 2.93 <sup>1</sup>        | Phloroglucinol di-O-hexoside-O-acetate <sup>L</sup> [44]       | PGL                     | -15                  | 491                             | [491]: 449 (22), 287 (10), 125 (100)          |             |
| 12 | 3.09 <sup>1</sup>        | Phloroglucinol di-O-hexoside-O-acetate <sup>L</sup> [44]       | PGL                     | -15                  | 491                             | [491]: 449 (18), 287 (9), 125 (100)           |             |
| 13 | 3.18 <sup>1</sup>        | Phloroglucinol di-O-hexoside-di-O-acetate <sup>L</sup> [44]    | PGL                     | -15                  | 533                             | [533]: 491 (5), 449 (26), 287 (12), 125 (100) |             |
| 14 | 3.24 <sup>1</sup>        | Phloroglucinol di-O-hexoside-di-O-acetate <sup>L</sup> [44]    | PGL                     | -15                  | 533                             | [533]: 491 (3), 449 (20), 287 (10), 125 (100) |             |
| 15 | 3.31 <sup>1</sup>        | Hydroquinone di-O-hexoside <sup>L</sup> [45,46]                | HQU                     | -10                  | 433                             | [433]: 271 (100), 109 (12)                    |             |
| 16 | 3.43 <sup>1</sup>        | Hydroquinone di-O-hexoside <sup>L</sup> [45,46]                | HQU                     | -10                  | 433                             | [433]: 271 (100), 109 (9)                     |             |
| 17 | 3.64 <sup>1</sup>        | Arbutin (hydroquinone O-glucoside) <sup>R</sup> [45,46]        | HQU                     | -10                  | 271                             | [271]: 109                                    |             |
| 18 | 3.69 <sup>1</sup>        | Orcinol di-O-hexoside <sup>L</sup> [47]                        | ORC                     | -10                  | 447                             | [447]: 285 (36), 123 (100)                    |             |
| 19 | 3.81 <sup>1</sup>        | Hydroquinone di-O-hexoside-O-methyl ester <sup>L</sup> [45,46] | HQU                     | -10                  | 447                             | [447]: 285 (23), 123 (100), 109 (12)          |             |
| 20 | 3.92 <sup>1</sup>        | Hydroquinone O-hexoside-O-methyl ester <sup>L</sup> [45,46]    | HQU                     | -10                  | 285                             | [285]: 123 (100), 109 (22)                    |             |
| 21 | 4.09 <sup>1</sup>        | Sakakin (orcinol O-glucoside) <sup>R</sup> [47]                | ORC                     | -10                  | 285                             | [285]: 123                                    |             |
| 22 | 4.26 <sup>1</sup>        | Ursolic acid tri-O-hexoside <sup>L</sup> [33,48]               | Nil                     | -20                  | 941                             | [941]: 779 (10), 617 (100), 455 (54)          |             |
| 23 | 4.31 <sup>1</sup>        | Ursolic acid tri-O-hexoside <sup>L</sup> [33,48]               | Nil                     | -20                  | 941                             | [941]: 779 (14), 617 (100), 455 (43)          |             |
| 24 | 4.47 <sup>1</sup>        | Orcinol O-hexoside-O-acetate <sup>L</sup> [47]                 | ORC                     | -15                  | 327                             | [327]: 285 (16), 123 (100)                    |             |

Table S3. Cont.

| No | $t_R$ (min) <sup>a</sup> | Compound <sup>b</sup>                                                                     | UV pattern <sup>c</sup> | CE (eV) <sup>d</sup> | ESI-MS ( $m/z$ )    |                                                                                            | Adduct ions |
|----|--------------------------|-------------------------------------------------------------------------------------------|-------------------------|----------------------|---------------------|--------------------------------------------------------------------------------------------|-------------|
|    |                          |                                                                                           |                         |                      | [M-H] <sup>-e</sup> | MS/MS ( $I$ , %) <sup>f</sup>                                                              |             |
| 25 | 4.58 <sup>I</sup>        | Ursolic acid di- <i>O</i> -hexoside <sup>L</sup> [33,48]                                  | Nil                     | -20                  | 779                 | [779]: 617 (100), 455 (37)                                                                 |             |
| 26 | 4.74 <sup>I</sup>        | Ursolic acid di- <i>O</i> -hexoside <sup>L</sup> [33,48]                                  | Nil                     | -20                  | 779                 | [779]: 617 (100), 455 (34)                                                                 |             |
| 27 | 4.79 <sup>I</sup>        | Ursolic acid tri- <i>O</i> -hexoside- <i>O</i> -acetate <sup>L</sup> [33,48]              | Nil                     | -20                  | 983                 | [983]: 941 (26), 779 (8), 617 (100), 455 (43)                                              |             |
| 28 | 4.97 <sup>I</sup>        | Ursolic acid tri- <i>O</i> -hexoside- <i>O</i> -acetate <sup>L</sup> [33,48]              | Nil                     | -20                  | 983                 | [983]: 941 (20), 779 (4), 617 (100), 455 (35)                                              |             |
| 29 | 5.18 <sup>I</sup>        | Ursolic acid di- <i>O</i> -hexoside- <i>O</i> -acetate <sup>L</sup> [33,48]               | Nil                     | -20                  | 821                 | [821]: 779 (18), 617 (100), 455 (29)                                                       |             |
| 30 | 5.46 <sup>I</sup>        | Ursolic acid <i>O</i> -hexoside <sup>L</sup> [33,48]                                      | Nil                     | -20                  | 617                 | [617]: 455                                                                                 |             |
| 31 | 5.53 <sup>I</sup>        | Ursolic acid di- <i>O</i> -hexoside-di- <i>O</i> -acetate <sup>L</sup> [33,48]            | Nil                     | -20                  | 863                 | [863]: 821 (9), 779 (22), 659 (8), 617 (100), 455 (31)                                     |             |
| 32 | 5.74 <sup>I</sup>        | Ursolic acid di- <i>O</i> -hexoside-di- <i>O</i> -acetate <sup>L</sup> [33,48]            | Nil                     | -20                  | 863                 | [863]: 821 (11), 779 (25), 659 (4), 617 (100), 455 (25)                                    |             |
| 33 | 7.87 <sup>I</sup>        | Ursolic acid <i>O</i> -hexoside- <i>O</i> -acetate <sup>L</sup> [33,48]                   | Nil                     | -20                  | 659                 | [659]: 617 (100), 455 (30)                                                                 |             |
| 34 | 8.28 <sup>I</sup>        | Ursolic acid <i>O</i> -hexoside- <i>O</i> -acetate <sup>L</sup> [33,48]                   | Nil                     | -20                  | 659                 | [659]: 617 (100), 455 (35)                                                                 |             |
| 35 | 10.26 <sup>I</sup>       | Ursolic acid <i>O</i> -hexoside-di- <i>O</i> -acetate <sup>L</sup> [33,48]                | Nil                     | -20                  | 701                 | [701]: 659 (3), 617 (100), 455 (29)                                                        |             |
| 36 | 2.72 <sup>II</sup>       | Myricetin tri- <i>O</i> -hexoside-tri- <i>O</i> -desoxyhexoside <sup>L</sup> [49–51]      | MYR                     | -30                  | 1241                | [1241]: 1095 (100), 949 (22), 933 (2)<br>[949]: 803 (100), 641 (36), 479 (7)<br>[479]: 317 |             |
| 37 | 2.79 <sup>II</sup>       | Myricetin tri- <i>O</i> -hexoside-di- <i>O</i> -desoxyhexoside <sup>L</sup> [49–51]       | MYR                     | -30                  | 1095                | [1095]: 949 (100), 803 (27), 641 (9)<br>[803]: 641 (100), 479 (31)<br>[479]: 317           |             |
| 38 | 2.97 <sup>II</sup>       | Quercetin tri- <i>O</i> -hexoside-di- <i>O</i> -desoxyhexoside <sup>L</sup> [12,13]       | QUE                     | -25                  | 1079                | [1079]: 933 (100), 787 (21), 625 (3)<br>[787]: 625 (100), 463 (23)<br>[463]: 301           |             |
| 39 | 3.22 <sup>II</sup>       | Dihydromyricetin di- <i>O</i> -hexoside <sup>L</sup> [12,52]                              | DHM                     | -20                  | 643                 | [643]: 481 (100), 319 (27)                                                                 |             |
| 40 | 3.45 <sup>II</sup>       | Dihydromyricetin <i>O</i> -hexoside <sup>L</sup> [12,52]                                  | DHM                     | -20                  | 481                 | [481]: 319                                                                                 |             |
| 41 | 3.52 <sup>II</sup>       | Dihydroquercetin di- <i>O</i> -hexoside-di- <i>O</i> -desoxyhexoside <sup>L</sup> [12,52] | DHQ                     | -25                  | 919                 | [919]: 773 (12), 627 (100), 611 (35)<br>[627]: 465 (100), 303 (5)                          |             |

Table S3. Cont.

| No | $t_R$ (min) <sup>a</sup> | Compound <sup>b</sup>                                                                  | UV pattern <sup>c</sup> | CE (eV) <sup>d</sup> | ESI-MS ( $m/z$ )    |                                                          | Adduct ions |
|----|--------------------------|----------------------------------------------------------------------------------------|-------------------------|----------------------|---------------------|----------------------------------------------------------|-------------|
|    |                          |                                                                                        |                         |                      | [M-H] <sup>-e</sup> | MS/MS ( $I$ , %) <sup>f</sup>                            |             |
| 42 | 3.64 <sup>II</sup>       | Dihydroquercetin di- <i>O</i> -hexoside- <i>O</i> -desoxyhexoside <sup>L</sup> [12,52] | DHQ                     | -25                  | 773                 | [773]: 627 (100), 465 (32)<br>[465]: 303                 |             |
| 43 | 3.72 <sup>II</sup>       | Dihydroquercetin <i>O</i> -hexoside- <i>O</i> -desoxyhexoside <sup>L</sup> [12,52]     | DHQ                     | -25                  | 611                 | [611]: 465 (100), 303 (28)                               |             |
| 44 | 3.78 <sup>II</sup>       | Dihydroquercetin <i>O</i> -hexoside <sup>L</sup> [12,52]                               | DHQ                     | -20                  | 465                 | [465]: 303                                               |             |
| 45 | 3.83 <sup>II</sup>       | Dihydroquercetin 3- <i>O</i> -rhamnoside <sup>R</sup> [12,52]                          | DHQ                     | -20                  | 449                 | [449]: 303                                               |             |
| 46 | 4.09 <sup>II</sup>       | Myricetin di- <i>O</i> -hexoside-di- <i>O</i> -desoxyhexoside <sup>L</sup> [49–51]     | MYR                     | -25                  | 933                 | [933]: 787 (25), 641 (100)<br>[641]: 479 (100), 317 (27) |             |
| 47 | 4.18 <sup>II</sup>       | Myricetin di- <i>O</i> -hexoside- <i>O</i> -desoxyhexoside <sup>L</sup> [49–51]        | MYR                     | -25                  | 787                 | [787]: 641 (100), 479 (35)<br>[479]: 317                 |             |
| 48 | 4.26 <sup>II</sup>       | Quercetin di- <i>O</i> -hexoside- <i>O</i> -desoxyhexoside <sup>L</sup> [12,13]        | QUE                     | -25                  | 771                 | [771]: 625 (21), 463 (100), 301 (12)                     |             |
| 49 | 4.31 <sup>II</sup>       | Myricetin <i>O</i> -hexoside- <i>O</i> -desoxyhexoside <sup>L</sup> [49–51]            | MYR                     | -25                  | 625                 | [625]: 479 (100), 317 (25)                               |             |
| 50 | 4.43 <sup>II</sup>       | Myricetin 3- <i>O</i> -rutinoside <sup>R</sup> [49–51]                                 | MYR                     | -25                  | 625                 | [625]: 479 (100), 317 (3)                                |             |
| 51 | 4.51 <sup>II</sup>       | Myricetin 3- <i>O</i> -galactoside <sup>R</sup> [49–51]                                | MYR                     | -20                  | 479                 | [479]: 317                                               |             |
| 52 | 4.58 <sup>II</sup>       | Isomyricitrin (myricetin 3- <i>O</i> -glucoside) <sup>R</sup> [49–51]                  | MYR                     | -20                  | 479                 | [479]: 317                                               |             |
| 53 | 4.74 <sup>II</sup>       | Rutin (quercetin 3- <i>O</i> -rutinoside) <sup>R</sup> [12,13]                         | QUE                     | -20                  | 609                 | [609]: 463 (100), 301 (15)                               |             |
| 54 | 4.78 <sup>II</sup>       | Hyperoside (quercetin 3- <i>O</i> -galactoside) <sup>R</sup> [12,13]                   | QUE                     | -20                  | 463                 | [463]: 301                                               |             |
| 55 | 4.83 <sup>II</sup>       | Isoquercitrin (quercetin 3- <i>O</i> -glucoside) <sup>R</sup> [12,13]                  | QUE                     | -20                  | 463                 | [463]: 301                                               |             |
| 56 | 4.97 <sup>II</sup>       | Myricetin <i>O</i> -pentoside <sup>L</sup> [49–51]                                     | MYR                     | -20                  | 449                 | [449]: 317                                               |             |
| 57 | 5.11 <sup>II</sup>       | Avicularin (quercetin 3- <i>O</i> -arabinoside) <sup>R</sup> [12,13]                   | QUE                     | -20                  | 433                 | [433]: 301                                               |             |
| 58 | 5.26 <sup>II</sup>       | Myricitrin (myricetin 3- <i>O</i> -rhamnoside) <sup>R</sup> [49–51]                    | MYR                     | -20                  | 463                 | [463]: 317                                               |             |
| 59 | 5.63 <sup>II</sup>       | Quercitrin (quercetin 3- <i>O</i> -rhamnoside) <sup>R</sup> [12,13]                    | QUE                     | -20                  | 433                 | [433]: 301                                               |             |
| 60 | 5.77 <sup>II</sup>       | Juglanin (kaempferol 3- <i>O</i> -arabinoside) <sup>R</sup> [35]                       | KAE                     | -20                  | 417                 | [417]: 285                                               |             |
| 61 | 6.29 <sup>II</sup>       | Afzelin (kaempferol 3- <i>O</i> -rhamnoside) <sup>R</sup> [35]                         | KAE                     | -20                  | 431                 | [431]: 285                                               |             |
| 62 | 8.25 <sup>II</sup>       | Dihydroquercetin (taxifloin) <sup>R</sup> [12,52]                                      | DHQ                     | -15                  | 303                 |                                                          |             |
| 63 | 8.68 <sup>II</sup>       | Phloretin <sup>R</sup> [35]                                                            | PHL                     | -15                  | 273                 |                                                          |             |



Table S3. Cont.

| No | $t_R$ (min) <sup>a</sup> | Compound <sup>b</sup>                                                                        | UV pattern <sup>c</sup> | CE (eV) <sup>d</sup> | ESI-MS ( $m/z$ )    |                                                                                                                     | Adduct ions         |
|----|--------------------------|----------------------------------------------------------------------------------------------|-------------------------|----------------------|---------------------|---------------------------------------------------------------------------------------------------------------------|---------------------|
|    |                          |                                                                                              |                         |                      | [M-H] <sup>-e</sup> | MS/MS ( $I$ , %) <sup>f</sup>                                                                                       |                     |
| 64 | 8.83 <sup>II</sup>       | Dihydrokaempferol (aromadendrin) <sup>R</sup> [12,52]                                        | DHK                     | -15                  | 287                 |                                                                                                                     |                     |
| 65 | 9.01 <sup>II</sup>       | Myricetin <sup>R</sup> [49–51]                                                               | MYR                     | -15                  | 317                 |                                                                                                                     |                     |
| 66 | 9.23 <sup>II</sup>       | Quercetin <sup>R</sup> [12,13]                                                               | QUE                     | -15                  | 301                 |                                                                                                                     |                     |
| 67 | 9.27 <sup>II</sup>       | Luteolin <sup>R</sup> [35]                                                                   | LUT                     | -15                  | 285                 |                                                                                                                     |                     |
| 68 | 9.37 <sup>II</sup>       | Apigenin <sup>R</sup> [35]                                                                   | API                     | -15                  | 269                 |                                                                                                                     |                     |
| 69 | 9.51 <sup>II</sup>       | Isorhamnetin <sup>R</sup> [35]                                                               | QUE                     | -15                  | 315                 |                                                                                                                     |                     |
| 70 | 9.76 <sup>II</sup>       | Cannabigerorcinic acid<br>O-methyl ester<br>di-O-hexoside <sup>L</sup> [53,54]               | CGA                     | -15                  | 641                 | [641]: 479 (26), 317 (100), 303 (5)<br>[317]: 303 (28), 285 (100)<br>[303]: 285 (18), 275 (43), 234 (100), 166 (18) |                     |
| 71 | 9.93 <sup>II</sup>       | Cannabigerorcinic acid<br>O-methyl ester<br>di-O-hexoside <sup>L</sup> [53,54]               | CGA                     | -15                  | 641                 | [641]: 479 (23), 317 (100), 303 (7)<br>[317]: 303 (24), 285 (100)<br>[303]: 285 (16), 275 (51), 234 (100), 166 (22) |                     |
| 72 | 10.04 <sup>II</sup>      | Cannabigerorcinic acid<br>O-methyl ester<br>O-hexoside-O-desoxyhexoside <sup>L</sup> [53,54] | CGA                     | -15                  | 625                 | [625]: 479 (31), 317 (100)<br>[317]: 303 (25), 285 (100)<br>[303]: 285 (18), 275 (45), 234 (100), 166 (26)          |                     |
| 73 | 10.24 <sup>II</sup>      | Kaempferol <sup>R</sup> [35]                                                                 | KAE                     | -10                  | 285                 |                                                                                                                     |                     |
| 74 | 10.48 <sup>II</sup>      | Farrerol <sup>R</sup> [35]                                                                   | FAR                     | -10                  | 299                 |                                                                                                                     |                     |
| 75 | 10.63 <sup>II</sup>      | Cannabigerorcinic acid<br>methyl ester O-hexoside <sup>L</sup> [53,54]                       | CGA                     | -20                  | 479                 | [479]: 317 (42), 303 (100), 285 (93)<br>[303]: 285 (15), 275 (38), 234 (100), 166 (16)                              |                     |
| 76 | 10.97 <sup>II</sup>      | Cannabigerorcinic acid<br>di-O-methyl ester<br>O-hexoside <sup>L</sup> [53,54]               | CGA                     | -22                  | 493                 | [493]: 331 (19), 317 (5), 303 (100), 285 (14)<br>[303]: 285 (22), 275 (40), 234 (100), 166 (19)                     |                     |
| 77 | 11.05 <sup>II</sup>      | Cannabigerorcinic acid<br>di-O-methyl ester<br>O-hexoside <sup>L</sup> [53,54]               | CGA                     | -22                  | 493                 | [493]: 331 (22), 317 (7), 303 (100), 285 (11)<br>[303]: 285 (26), 275 (42), 234 (100), 166 (20)                     |                     |
| 78 | 11.22 <sup>II</sup>      | Cannabigerorcinic acid<br>di-O-methyl ester<br>O-hexoside <sup>L</sup> [53,54]               | CGA                     | -22                  | 493                 | [493]: 331 (21), 317 (5), 303 (100), 285 (14)<br>[303]: 285 (31), 275 (49), 234 (100), 166 (25)                     |                     |
| 79 | 11.47 <sup>II</sup>      | Cannabigerorcinic acid<br>O-methyl ester <sup>L</sup> [53,54]                                | CGA                     | -30                  | 317                 | [317]: 303 (27), 285 (100)<br>[303]: 285 (21), 275 (43), 234 (100), 166 (22)                                        | 635 <sup>2M-H</sup> |
| 80 | 11.52 <sup>II</sup>      | Cannabigerorcinic acid<br>O-methyl ester <sup>L</sup> [53,54]                                | CGA                     | -30                  | 317                 | [317]: 303 (26), 285 (100)<br>[303]: 285 (22), 275 (46), 234 (100), 166 (27)                                        |                     |
| 81 | 11.74 <sup>II</sup>      | Cannabigerorcinic acid<br>di-O-methyl ester <sup>L</sup> [53,54]                             | CGA                     | -30                  | 331                 | [331]: 317 (10), 303 (100), 285 (73)<br>[303]: 285 (24), 275 (47), 234 (100), 166 (23)                              |                     |
| 82 | 12.04 <sup>II</sup>      | Cannabigerorcinic acid<br>di-O-methyl ester <sup>L</sup> [53,54]                             | CGA                     | -30                  | 331                 | [331]: 317 (9), 303 (100), 285 (75)<br>[303]: 285 (27), 275 (40), 234 (100), 166 (18)                               |                     |

Table S3. Cont.

| No  | $t_R$ (min) <sup>a</sup> | Compound <sup>b</sup>                                                          | UV pattern <sup>c</sup> | CE (eV) <sup>d</sup> | ESI-MS ( $m/z$ )    |                                                                                                 | Adduct ions |
|-----|--------------------------|--------------------------------------------------------------------------------|-------------------------|----------------------|---------------------|-------------------------------------------------------------------------------------------------|-------------|
|     |                          |                                                                                |                         |                      | [M-H] <sup>-e</sup> | MS/MS ( $I$ , %) <sup>f</sup>                                                                   |             |
| 83  | 13.15 <sup>III</sup>     | Cannabigerorcinic acid tri- <i>O</i> -methyl ester <sup>L</sup> [53,54]        | CGA                     | -30                  | 345                 | [345]: 331 (5), 317 (63), 303 (100), 285 (52)<br>[303]: 285 (24), 275 (49), 234 (100), 166 (16) |             |
| 84  | 0.68 <sup>III</sup>      | Protocatechuic acid di- <i>O</i> -hexoside <sup>L</sup> [35]                   | PCA                     | -15                  | 477                 | [477]: 315 (22), 153 (100)                                                                      |             |
| 85  | 0.89 <sup>III</sup>      | Protocatechuic acid <i>O</i> -hexoside <sup>L</sup> [35]                       | PCA                     | -15                  | 315                 | [315]: 153                                                                                      |             |
| 86  | 2.42 <sup>III</sup>      | 1- <i>O</i> -Caffeoylquinic acid <sup>R</sup> [55]                             | CQA                     | -15                  | 353                 | [353]: 191 (100), 179 (15), 173 (3), 135 (5)                                                    |             |
| 87  | 2.71 <sup>III</sup>      | Vanillic/isovanillic acid <i>O</i> -hexoside <sup>L</sup> [35]                 | VA                      | -15                  | 329                 | [329]: 167                                                                                      |             |
| 88  | 2.76 <sup>III</sup>      | Vanillic/isovanillic acid <i>O</i> -hexoside <sup>L</sup> [35]                 | VA                      | -15                  | 329                 | [329]: 167                                                                                      |             |
| 89  | 2.81 <sup>III</sup>      | Vanillic acid 4- <i>O</i> -glucoside <sup>R</sup> [35]                         | VA                      | -15                  | 329                 | [329]: 167                                                                                      |             |
| 90  | 2.95 <sup>III</sup>      | Vanillic/isovanillic acid <i>O</i> -hexoside <sup>L</sup> [35]                 | VA                      | -15                  | 329                 | [329]: 167                                                                                      |             |
| 91  | 3.42 <sup>III</sup>      | Myricetin di- <i>O</i> -hexoside-di- <i>O</i> -hexuronide <sup>L</sup> [49–51] | MYR                     | -30                  | 993                 | [993]: 817 (82), 655 (100)<br>[655]: 479 (100), 317 (23)                                        |             |
| 92  | 3.54 <sup>III</sup>      | Myricetin di- <i>O</i> -hexoside-di- <i>O</i> -hexuronide <sup>L</sup> [49–51] | MYR                     | -30                  | 993                 | [993]: 817 (89), 655 (100)<br>[655]: 479 (100), 317 (21)                                        |             |
| 93  | 3.74 <sup>III</sup>      | Myricetin di- <i>O</i> -hexoside- <i>O</i> -hexuronide <sup>L</sup> [49–51]    | MYR                     | -25                  | 817                 | [817]: 641 (100), 479 (35)<br>[479]: 317                                                        |             |
| 94  | 4.11 <sup>III</sup>      | Myricetin <i>O</i> -hexoside-di- <i>O</i> -hexuronide <sup>L</sup> [49–51]     | MYR                     | -25                  | 831                 | [831]: 655 (12), 479 (100), 317 (20)                                                            |             |
| 95  | 4.26 <sup>III</sup>      | 5- <i>O</i> -Caffeoylquinic acid <sup>R</sup> [55]                             | CQA                     | -15                  | 353                 | [353]: 191 (100), 179 (4), 165 (15)                                                             |             |
| 96  | 4.51 <sup>III</sup>      | 3- <i>O</i> -Caffeoylquinic acid <sup>R</sup> [55]                             | CQA                     | -15                  | 353                 | [353]: 191 (100), 179 (81), 135 (22)                                                            |             |
| 97  | 4.67 <sup>III</sup>      | Myricetin <i>O</i> -hexoside- <i>O</i> -hexuronide <sup>L</sup> [49–51]        | MYR                     | -25                  | 655                 | [655]: 479 (100), 317 (25)                                                                      |             |
| 98  | 4.72 <sup>III</sup>      | 4- <i>O</i> -Caffeoylquinic acid <sup>R</sup> [55]                             | CQA                     | -15                  | 353                 | [353]: 191 (19), 179 (100), 173 (91), 135 (12)                                                  |             |
| 99  | 4.89 <sup>III</sup>      | Myricetin <i>O</i> -hexuronide <sup>L</sup> [49–51]                            | MYR                     |                      | 493                 | [493]: 317                                                                                      |             |
| 100 | 5.03 <sup>III</sup>      | Quercetin di- <i>O</i> -hexoside- <i>O</i> -hexuronide <sup>L</sup> [12,13]    | QUE                     | -25                  | 801                 | [801]: 625 (11), 463 (100), 301 (14)                                                            |             |
| 101 | 5.14 <sup>III</sup>      | Quercetin <i>O</i> -hexoside-di- <i>O</i> -hexuronide <sup>L</sup> [12,13]     | QUE                     | -25                  | 815                 | [801]: 639 (5), 463 (100), 301 (12)                                                             |             |
| 102 | 5.26 <sup>III</sup>      | Dihydroquercetin <i>O</i> -hexuronide <sup>L</sup> [12,51]                     | DHQ                     | -25                  | 479                 | [479]: 303                                                                                      |             |

Table S3. Cont.

| No  | $t_R$ (min) <sup>a</sup> | Compound <sup>b</sup>                                                               | UV pattern <sup>c</sup> | CE (eV) <sup>d</sup> | ESI-MS ( $m/z$ )    |                                                                                           | Adduct ions |
|-----|--------------------------|-------------------------------------------------------------------------------------|-------------------------|----------------------|---------------------|-------------------------------------------------------------------------------------------|-------------|
|     |                          |                                                                                     |                         |                      | [M-H] <sup>-e</sup> | MS/MS ( $I$ , %) <sup>f</sup>                                                             |             |
| 103 | 5.38 <sup>III</sup>      | Quercetin<br><i>O</i> -hexoside- <i>O</i> -hexuronide <sup>L</sup><br>[12,13]       | QUE                     | -25                  | 639                 | [639]: 463 (100), 301 (10)                                                                |             |
| 104 | 5.63 <sup>III</sup>      | Quercetin<br><i>O</i> -hexoside- <i>O</i> -hexuronide <sup>L</sup><br>[12,13]       | QUE                     | -25                  | 639                 | [639]: 463 (100), 301 (15)                                                                |             |
| 105 | 5.69 <sup>III</sup>      | Miquelianin (quercetin<br>3- <i>O</i> -glucuronide) <sup>R</sup> [12,13]            | QUE                     | -20                  | 477                 | [477]: 301                                                                                |             |
| 106 | 6.01 <sup>III</sup>      | Myricetin<br><i>O</i> -hexuronide- <i>O</i> -acetate <sup>L</sup><br>[48–50]        | MYR                     | -30                  | 535                 | [535]: 493 (100), 317 (28)                                                                |             |
| 107 | 6.78 <sup>III</sup>      | Myricetin<br><i>O</i> -hexoside-di- <i>O</i> -acetate <sup>L</sup><br>[49–51]       | MYR                     | -30                  | 563                 | [563]: 521 (25), 479 (100), 317 (33)                                                      |             |
| 108 | 6.92 <sup>III</sup>      | Myricetin<br><i>O</i> -hexouronide-di- <i>O</i> -<br>acetate <sup>L</sup> [49–51]   | MYR                     | -30                  | 577                 | [577]: 535 (3), 493 (100), 317 (18)                                                       |             |
| 109 | 7.22 <sup>III</sup>      | Dihydroquercetin<br><i>O</i> -hexuronide- <i>O</i> -acetate <sup>L</sup>            | DGQ                     | -25                  | 521                 | [521]: 479 (100), 303 (9)                                                                 |             |
| 110 | 7.36 <sup>III</sup>      | Quercetin<br><i>O</i> -hexuronide- <i>O</i> -acetate <sup>L</sup>                   | QUE                     | -25                  | 519                 | [519]: 477 (100), 301 (12)                                                                |             |
| 111 | 7.92 <sup>III</sup>      | Myricetin<br><i>O</i> -hexoside-di- <i>O</i> -acetate <sup>L</sup><br>[49–51]       | MYR                     | -30                  | 563                 | [563]: 521 (21), 479 (100), 317 (41)                                                      |             |
| 112 | 8.14 <sup>III</sup>      | Dihydroquercetin<br><i>O</i> -hexuronide-di- <i>O</i> -acetate <sup>L</sup> [12,52] | DHQ                     | -25                  | 563                 | [563]: 521 (7), 479 (100), 303 (9)                                                        |             |
| 113 | 8.26 <sup>III</sup>      | Dihydroquercetin<br><i>O</i> -hexuronide-di- <i>O</i> -acetate <sup>L</sup> [12,52] | DHQ                     | -25                  | 563                 | [563]: 521 (5), 479 (100), 303 (5)                                                        |             |
| 114 | 8.47 <sup>III</sup>      | Quercetin<br><i>O</i> -hexuronide-di- <i>O</i> -acetate <sup>L</sup> [12,13]        | QUE                     | -25                  | 561                 | [561]: 519 (12), 477 (100), 301 (14)                                                      |             |
| 115 | 8.69 <sup>III</sup>      | Quercetin<br><i>O</i> -hexuronide-di- <i>O</i> -acetate <sup>L</sup> [12,13]        | QUE                     | -25                  | 561                 | [561]: 519 (10), 477 (100), 301 (18)                                                      |             |
| 116 | 8.92 <sup>III</sup>      | Cannabigerorcinic acid<br>di- <i>O</i> -hexoside <sup>L</sup> [53,54]               | CGA                     | -25                  | 627                 | [627]: 465 (14), 303 (100), 285 (57)<br>[303]: 285 (25), 275 (42), 234 (100),<br>166 (20) |             |
| 117 | 9.01 <sup>III</sup>      | Cannabigerorcinic acid<br><i>O</i> -hexoside <sup>L</sup> [53,54]                   | CGA                     | -25                  | 465                 | [465]: 303 (73), 285 (100)<br>[303]: 285 (22), 275 (43), 234 (100),<br>166 (25)           |             |
| 118 | 9.18 <sup>III</sup>      | Myricetin<br><i>O</i> -hexoside-tri- <i>O</i> -acetate <sup>L</sup><br>[49–51]      | MYR                     | -25                  | 605                 | [605]: 563 (5), 479 (100), 317 (25)                                                       |             |
| 119 | 9.24 <sup>III</sup>      | Myricetin<br><i>O</i> -hexoside-tri- <i>O</i> -acetate <sup>L</sup><br>[49–51]      | MYR                     | -25                  | 605                 | [605]: 563 (2), 479 (100), 317 (31)                                                       |             |

Table S3. Cont.

| No  | $t_R$ (min) <sup>a</sup> | Compound <sup>b</sup>                                                          | UV pattern <sup>c</sup> | CE (eV) <sup>d</sup> | ESI-MS ( $m/z$ )    |                                                                                        | Adduct ions         |
|-----|--------------------------|--------------------------------------------------------------------------------|-------------------------|----------------------|---------------------|----------------------------------------------------------------------------------------|---------------------|
|     |                          |                                                                                |                         |                      | [M-H] <sup>-e</sup> | MS/MS ( $I$ , %) <sup>f</sup>                                                          |                     |
| 120 | 9.33 <sup>III</sup>      | Cannabigerorcinic acid <sup>R</sup>                                            | CGA                     | -20                  | 303                 | [303]: 285 (37), 275 (50), 234 (100), 166 (25)                                         | 607 <sup>2M-H</sup> |
| 121 | 9.46 <sup>III</sup>      | Quercetin<br><i>O</i> -hexoside-tri- <i>O</i> -acetate <sup>L</sup><br>[12,13] | QUE                     | -25                  | 589                 | [589]: 547 (2), 505 (14), 463 (100), 301 (11)                                          |                     |
| 122 | 9.53 <sup>III</sup>      | Quercetin<br><i>O</i> -hexoside-tri- <i>O</i> -acetate <sup>L</sup><br>[12,13] | QUE                     | -25                  | 589                 | [589]: 547 (1), 505 (10), 463 (100), 301 (18)                                          |                     |
| 123 | 9.72 <sup>III</sup>      | Cannabigerorcinic acid<br><i>O</i> -acetate <sup>L</sup>                       | CGA                     | -20                  | 345                 | [345]: 303 (82), 285 (100)<br>[303]: 285 (31), 275 (43), 234 (100), 166 (22)           |                     |
| 124 | 9.81 <sup>III</sup>      | Cannabigerorcinic acid<br>di- <i>O</i> -acetate <sup>L</sup>                   | CGA                     | -20                  | 387                 | [387]: 345 (18), 303 (100), 285 (53)<br>[303]: 285 (29), 275 (42), 234 (100), 166 (18) |                     |
| 125 | 9.93 <sup>III</sup>      | Hydroxy-grifolic acid<br>di- <i>O</i> -hexoside <sup>L</sup> [53]              | GRA                     | -20                  | 711                 | [711]: 549 (18), 387 (100), 369 (73)<br>[387]: 369 (27), 318 (53), 250 (100), 196 (18) |                     |
| 126 | 9.98 <sup>III</sup>      | Hydroxy-grifolic acid<br><i>O</i> -hexoside <sup>L</sup> [53]                  | GRA                     | -20                  | 549                 | [549]: 387 (28), 369 (100)<br>[387]: 369 (25), 318 (50), 250 (100), 196 (14)           |                     |
| 127 | 10.09 <sup>III</sup>     | Hydroxy-grifolic acid<br><i>O</i> -hexoside <sup>L</sup> [53]                  | GRA                     | -20                  | 549                 | [549]: 387 (31), 369 (100)<br>[387]: 369 (29), 318 (48), 250 (100), 196 (16)           |                     |
| 128 | 10.27 <sup>III</sup>     | Hydroxy-grifolic acid<br><i>O</i> -pentoside <sup>L</sup> [53]                 | GRA                     | -20                  | 519                 | [519]: 387 (25), 369 (100)<br>[387]: 369 (25), 318 (50), 250 (100), 196 (18)           |                     |
| 129 | 10.40 <sup>III</sup>     | Cannabigerorcinic acid<br>tri- <i>O</i> -acetate <sup>L</sup> [53,54]          | CGA                     | -20                  | 429                 | [429]: 387 (3), 345 (12), 303 (100)<br>[303]: 285 (35), 275 (52), 234 (100), 166 (21)  |                     |
| 130 | 10.67 <sup>III</sup>     | Hydroxy-grifolic acid <sup>L</sup> [53]                                        | GRA                     | -20                  | 387                 | [387]: 369 (27), 318 (53), 250 (100), 196 (22)                                         |                     |
| 131 | 10.75 <sup>III</sup>     | Grifolic acid di- <i>O</i> -hexoside <sup>L</sup> [53]                         | GRA                     | -20                  | 695                 | [695]: 533 (23), 371 (100), 353 (83)<br>[371]: 353 (10), 302 (63), 234 (100), 180 (5)  |                     |
| 132 | 10.86 <sup>III</sup>     | Grifolic acid <i>O</i> -hexoside <sup>L</sup> [53]                             | GRA                     | -20                  | 533                 | [533]: 371 (51), 353 (100)<br>[371]: 353 (14), 302 (61), 234 (100), 180 (9)            |                     |
| 133 | 10.86 <sup>III</sup>     | Daurichromenic acid<br>di- <i>O</i> -hexoside <sup>L</sup> [53,54]             | DCA                     | -25                  | 693                 | [693]: 531 (52), 369 (100)<br>[369]: 351 (12), 300 (100), 232 (31)                     |                     |
| 134 | 11.06 <sup>III</sup>     | Daurichromenic acid<br><i>O</i> -hexoside <sup>L</sup> [53,54]                 | DCA                     | -25                  | 531                 | [531]: 369<br>[369]: 351 (10), 300 (100), 232 (29)                                     |                     |
| 135 | 11.26 <sup>III</sup>     | Hydroxy-daurichromenic<br>acid <sup>L</sup> [53,54]                            | HDCA                    | -30                  | 385                 | [385]: 367 (22), 316 (100), 248 (39)                                                   | 769 <sup>2M-H</sup> |
| 136 | 11.43 <sup>III</sup>     | Hydroxy-daurichromenic<br>acid <i>O</i> -methyl ester <sup>L</sup> [53,54]     | HDCA                    | -30                  | 399                 | [399]: 385 (15), 367 (100)<br>[385]: 367 (25), 316 (100), 248 (42)                     |                     |
| 137 | 11.64 <sup>III</sup>     | Grifolic acid <sup>R</sup> [53]                                                | GRA                     | -25                  | 371                 | [371]: 353 (15), 327 (33), 302 (62), 234 (100), 180 (12)                               | 741 <sup>2M-H</sup> |

Table S3. Cont.

| No  | $t_R$ (min) <sup>a</sup> | Compound <sup>b</sup>                                                              | UV pattern <sup>c</sup> | CE (eV) <sup>d</sup> | ESI-MS ( $m/z$ )    |                                                                                                            | Adduct ions         |
|-----|--------------------------|------------------------------------------------------------------------------------|-------------------------|----------------------|---------------------|------------------------------------------------------------------------------------------------------------|---------------------|
|     |                          |                                                                                    |                         |                      | [M-H] <sup>-e</sup> | MS/MS ( $I$ , %) <sup>f</sup>                                                                              |                     |
| 138 | 12.72 <sup>III</sup>     | Grifolic acid <i>O</i> -methyl ester <sup>L</sup> [53]                             | GRA                     | -25                  | 385                 | [385]: 371 (23), 353 (100)<br>[371]: 353 (14), 302 (59), 234 (100), 180 (10)                               |                     |
| 139 | 12.81 <sup>III</sup>     | Grifolic acid di- <i>O</i> -methyl ester <sup>L</sup> [53]                         | GRA                     | -25                  | 399                 | [399]: 385 (26), 367 (100)<br>[385]: 371 (20), 353 (100)<br>[371]: 353 (16), 302 (58), 234 (100), 180 (12) |                     |
| 140 | 12.92 <sup>III</sup>     | Grifolic acid <i>O</i> -methyl ester- <i>O</i> -acetate <sup>L</sup> [53]          | GRA                     | -25                  | 427                 | [427]: 385 (62), 371 (21), 353 (100)<br>[371]: 353 (18), 302 (60), 234 (100), 180 (14)                     |                     |
| 141 | 13.14 <sup>III</sup>     | Daurichromenic acid <sup>R</sup> [53,54]                                           | DCA                     | -30                  | 369                 | [369]: 351 (12), 300 (100), 232 (35)                                                                       | 737 <sup>2M-H</sup> |
| 142 | 13.42 <sup>III</sup>     | Daurichromenic acid <i>O</i> -acetate <sup>L</sup> [53,54]                         | DCA                     | -32                  | 411                 | [411]: 369 (100), 351 (18)<br>[369]: 351 (14), 300 (100), 232 (32)                                         |                     |
| 143 | 13.58 <sup>III</sup>     | Daurichromenic acid <i>O</i> -methyl ester <sup>L</sup> [53,54]                    | DCA                     | -35                  | 383                 | [383]: 369 (25), 351 (100)<br>[369]: 351 (12), 300 (100), 232 (30)                                         |                     |
| 144 | 13.74 <sup>III</sup>     | Daurichromenic acid <i>O</i> -methyl ester- <i>O</i> -acetate <sup>L</sup> [53,54] | DCA                     | -35                  | 425                 | [425]: 383 (35), 369 (53), 351 (100)<br>[369]: 351 (14), 300 (100), 232 (31)                               |                     |
| 145 | 14.23 <sup>III</sup>     | Daurichromenic acid di- <i>O</i> -methyl ester <sup>L</sup> [53,54]                | DCA                     | -35                  | 397                 | [397]: 383 (5), 369 (63), 351 (100)<br>[369]: 351 (9), 300 (100), 232 (28)                                 |                     |
| 146 | 2.70 <sup>IV</sup>       | Gallic acid di- <i>O</i> -hexoside <sup>L</sup> [28]                               | GA                      | -10                  | 493                 | [493]: 331 (52), 169 (100)<br>[169]: 151 (100), 141 (10)                                                   |                     |
| 147 | 3.27 <sup>IV</sup>       | Gallic acid <i>O</i> -hexoside <sup>L</sup> [28]                                   | GA                      | -10                  | 331                 | [331]: 169<br>[169]: 151 (100), 141 (14)                                                                   |                     |
| 148 | 3.94 <sup>IV</sup>       | Gallic acid <sup>R</sup> [28]                                                      | GA                      | -10                  | 169                 | [169]: 151 (100), 141 (12)                                                                                 |                     |
| 149 | 4.32 <sup>IV</sup>       | Gallic acid <i>O</i> -methyl ester <i>O</i> -hexoside <sup>L</sup> [28]            | GA                      | -15                  | 345                 | [345]: 183 (100), 169 (24)<br>[169]: 151 (100), 141 (9)                                                    |                     |
| 150 | 4.91 <sup>IV</sup>       | Gallic acid <i>O</i> -methyl ester <i>O</i> -hexoside <sup>L</sup> [28]            | GA                      | -15                  | 345                 | [345]: 183 (100), 169 (22)<br>[169]: 151 (100), 141 (7)                                                    |                     |
| 151 | 5.60 <sup>IV</sup>       | Gallic acid <i>O</i> -methyl ester <sup>R</sup> [28]                               | GA                      | -15                  | 183                 | [183]: 169<br>[169]: 151 (100), 141 (11)                                                                   |                     |
| 152 | 7.82 <sup>IV</sup>       | Catechin/epicatechin di- <i>O</i> -hexoside <sup>L</sup> [28]                      | CAT                     | -20                  | 613                 | [613]: 451 (53), 289 (100)                                                                                 |                     |
| 153 | 8.51 <sup>IV</sup>       | Catechin/epicatechin <i>O</i> -hexoside <sup>L</sup> [28]                          | CAT                     | -20                  | 451                 | [451]: 289                                                                                                 |                     |
| 154 | 9.03 <sup>IV</sup>       | Procyanidin B <sub>1</sub> <sup>R</sup> [28]                                       | CAT                     | -30                  | 577                 | [577]: 289                                                                                                 |                     |
| 155 | 9.82 <sup>IV</sup>       | Catechin <sup>R</sup> [28]                                                         | CAT                     | -20                  | 289                 | [289]: 247 (100), 191 (28), 123 (9)                                                                        |                     |
| 156 | 10.76 <sup>IV</sup>      | Catechin/epicatechin <i>O</i> -hexoside- <i>O</i> -gallate <sup>L</sup> [28]       | CAT                     | -20                  | 603                 | [603]: 451 (33), 289 (100)                                                                                 |                     |
| 157 | 12.15 <sup>IV</sup>      | Catechin/epicatechin <i>O</i> -hexoside <sup>L</sup> [28]                          | CAT                     | -20                  | 451                 | [451]: 289                                                                                                 |                     |
| 158 | 13.02 <sup>IV</sup>      | Procyanidin B <sub>2</sub> <sup>R</sup> [28]                                       | CAT                     | -30                  | 577                 | [577]: 289                                                                                                 |                     |
| 159 | 13.54 <sup>IV</sup>      | Epicatechin <sup>R</sup> [28]                                                      | CAT                     | -20                  | 289                 | [289]: 247 (14), 191 (58), 123 (100)                                                                       |                     |
| 160 | 15.51 <sup>IV</sup>      | Procyanidin C <sub>1</sub> <sup>R</sup> [28]                                       | CAT                     | -20                  | 865                 | [865]: 577 (82), 289 (100)                                                                                 |                     |
| 161 | 19.67 <sup>IV</sup>      | Catechin 3- <i>O</i> -gallate <sup>R</sup> [28]                                    | CAT                     | -20                  | 441                 | [441]: 289 (9), 125 (15), 109 (100)                                                                        |                     |
| 162 | 20.52 <sup>IV</sup>      | Catechin/epicatechin dimer <i>O</i> -gallate <sup>L</sup> [28]                     | CAT                     | -30                  | 729                 | [729]: 577 (100), 289 (53)                                                                                 |                     |

Table S3. Cont.

| No  | $t_R$ (min) <sup>a</sup> | Compound <sup>b</sup>                                                          | UV pattern <sup>c</sup> | CE (eV) <sup>d</sup> | ESI-MS ( $m/z$ )                |                                                                     | Adduct ions |
|-----|--------------------------|--------------------------------------------------------------------------------|-------------------------|----------------------|---------------------------------|---------------------------------------------------------------------|-------------|
|     |                          |                                                                                |                         |                      | [M-H] <sup>-</sup> <sup>e</sup> | MS/MS ( $I$ , %) <sup>f</sup>                                       |             |
| 163 | 21.48 <sup>IV</sup>      | Catechin/epicatechin dimer di- <i>O</i> -gallate <sup>L</sup> [28]             | CAT                     | -30                  | 881                             | [729]: 577 (100), 289 (44)                                          |             |
| 164 | 22.26 <sup>IV</sup>      | Epicatechin 3- <i>O</i> -gallate <sup>R</sup> [28]                             | CAT                     | -20                  | 441                             | [441]: 289 (15), 125 (42), 109 (100)                                |             |
| 165 | 22.97 <sup>IV</sup>      | Myricetin tri- <i>O</i> -hexoside-di- <i>O</i> -gallate <sup>L</sup> [49–51]   | MYR                     | -30                  | 1107                            | [1107]: 955 (14), 803 (83), 641 (100)<br>[641]: 479 (100), 317 (27) |             |
| 166 | 23.67 <sup>IV</sup>      | Myricetin di- <i>O</i> -hexoside-di- <i>O</i> -gallate <sup>L</sup> [49–51]    | MYR                     | -30                  | 945                             | [945]: 793 (41), 641 (100)<br>[641]: 479 (100), 317 (25)            |             |
| 167 | 24.43 <sup>IV</sup>      | Myricetin di- <i>O</i> -hexoside- <i>O</i> -gallate <sup>L</sup> [49–51]       | MYR                     | -30                  | 793                             | [793]: 641 (14), 479 (100), 317 (21)                                |             |
| 168 | 25.63 <sup>IV</sup>      | Myricetin <i>O</i> -hexoside- <i>O</i> -gallate <sup>L</sup> [49–51]           | MYR                     | -25                  | 631                             | [631]: 479 (100), 317 (25)                                          |             |
| 169 | 25.83 <sup>IV</sup>      | Myricetin <i>O</i> -hexoside- <i>O</i> -gallate <sup>L</sup> [49–51]           | MYR                     | -25                  | 631                             | [631]: 479 (100), 317 (30)                                          |             |
| 170 | 26.74 <sup>IV</sup>      | Quercetin 3- <i>O</i> -(6''- <i>O</i> -galloyl)-glucoside <sup>R</sup> [12,13] | QUE                     | -25                  | 615                             | [615]: 463 (100), 301 (12)                                          |             |
| 171 | 28.02 <sup>IV</sup>      | Quercetin <i>O</i> -hexoside-di- <i>O</i> -gallate <sup>L</sup> [12,13]        | QUE                     | -25                  | 767                             | [767]: 615 (8), 463 (100), 301 (15)                                 |             |

<sup>a</sup> Chromatographic conditions: I—mode 1; II—mode 2; III—mode 3; IV—mode 4. <sup>b</sup> Compound identification was based on comparison of retention time, UV and MS spectral data with reference standard (<sup>R</sup>) or interpretation of UV and MS spectral data and comparison with literature data (<sup>L</sup>). <sup>c</sup> UV-patterns as listed in Table S4. <sup>d</sup> CE—collision energy. <sup>e</sup> Mass spectrometric data: deprotonated ion [M-H]<sup>-</sup>. <sup>f</sup> Signal intensity (percentage).

**Table S4.** UV-spectral patterns of compounds found in *R. adamsii*.

| Name of UV-pattern | Group of compound                                     | $\lambda_{\max}$ , nm                             |
|--------------------|-------------------------------------------------------|---------------------------------------------------|
| API                | Apigenin                                              | 270, 335                                          |
| CAT                | Catechins                                             | 275 ( $\pm 1$ )                                   |
| CGA                | Cannabigerorcinic acid (CGA) / CGA derivatives        | 220 ( $\pm 2$ ), 270 ( $\pm 2$ ), 305 ( $\pm 3$ ) |
| CQA                | Caffeoylquinic acids                                  | 290 ( $\pm 2$ ) sh, 324 ( $\pm 2$ )               |
| DCA                | Daurichromenic acid (DCA) / DCA derivatives           | 260 ( $\pm 2$ )                                   |
| DHQ                | Dihydroquercetin (DHQ) / DHQ glycosides               | 290 ( $\pm 2$ ), 325 ( $\pm 2$ ) sh               |
| DHK                | Dihydrokaempferol (DHK) / DHK glycosides              | 291 ( $\pm 2$ ) sh, 330 ( $\pm 2$ )               |
| DHM                | Dihydromyricetin (DHM) / DHM glycosides               | 295 ( $\pm 2$ ) sh, 320 ( $\pm 4$ )               |
| FAR                | Farrerol                                              | 260, 330                                          |
| GA                 | Gallic acid (GA) / GA derivatives                     | 271 ( $\pm 2$ )                                   |
| GRA                | Grifolic acid (GRA) / GRA derivatives                 | 220 ( $\pm 2$ ), 270 ( $\pm 2$ ), 310 ( $\pm 3$ ) |
| HDCA               | Hydroxy-daurichromenic acid (HDCA) / HDCA derivatives | 230 ( $\pm 3$ ), 260 ( $\pm 2$ )                  |
| HQU                | Hydroquinone (HQU) / HQU derivatives                  | 282 ( $\pm 1$ )                                   |
| KAE                | Kaempferol (Ka) / Ka glycosides                       | 265 ( $\pm 3$ ), 360 ( $\pm 5$ )                  |
| LUT                | Luteolin                                              | 255 sh, 265, 355                                  |
| MYR                | Myricetin (My) / My glycosides                        | 255 ( $\pm 3$ ), 370 ( $\pm 5$ )                  |
| Nil                | No absorption > 200 nm                                | -                                                 |
| ORC                | Orcinol (ORC) / ORC derivatives                       | 230 ( $\pm 2$ ), 275 ( $\pm 2$ ), 280 ( $\pm 3$ ) |
| QUE                | Quercetin (Qu) / Qu glycosides                        | 256 ( $\pm 3$ ), 267 ( $\pm 2$ ), 362 ( $\pm 4$ ) |
| PCA                | Protocatechuic acid glycosides                        | 260 ( $\pm 1$ ), 291 ( $\pm 2$ )                  |
| PGL                | Phloroglucinol (PGL) / PGL derivatives                | 266 ( $\pm 2$ )                                   |
| PHL                | Phloretin                                             | 220, 260                                          |
| VA                 | Vanillic/isovanillic acid (VA) / VA derivatives       | 260 ( $\pm 1$ ), 292 ( $\pm 2$ )                  |

sh—shoulder.

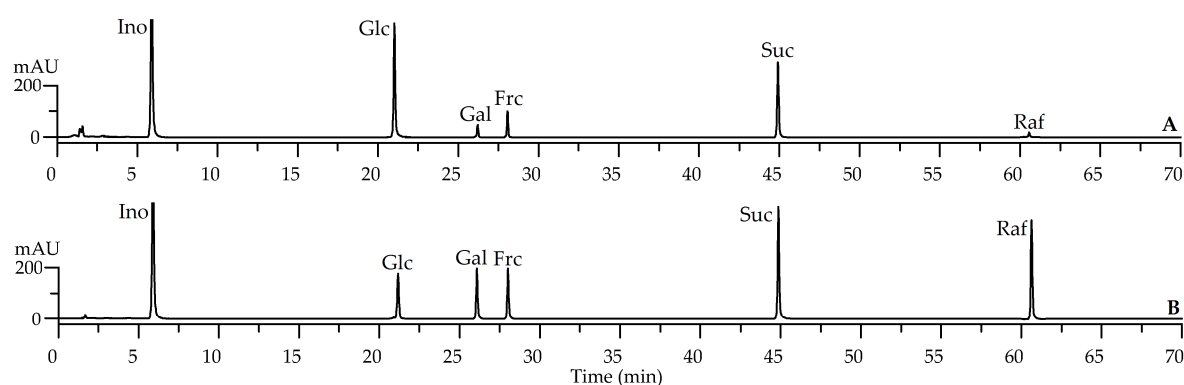

**Figure S1.** High-performance anion-exchange chromatography with photodiode detection (HPAEC-PDA) chromatograms of free carbohydrates of *Rhododendron adamsii* leaves (July sample, **A**) and reference standards (**B**). Chromatographic conditions: liquid chromatograph LC-20 Prominence coupled with photodiode array detector SPD-M30A (all Shimadzu, Columbia, MD, USA) and column Dionex CarboPac MA1 (4 × 250 mm, 8.5 µm; Thermo Fisher Scientific, Sunnyvale, CA, USA); isocratic elution; eluent 0.6 M NaOH; flow rate: 400 µL/min; column temperature 25 °C; sample volume 5 µL; detection wavelength 190 nm. Inositol (Ino) was used as an internal standard. Carbohydrates were signed as Frc—fructose, Gal—galactose, Glc—glucose, Raf—raffinose, and Suc—sucrose.



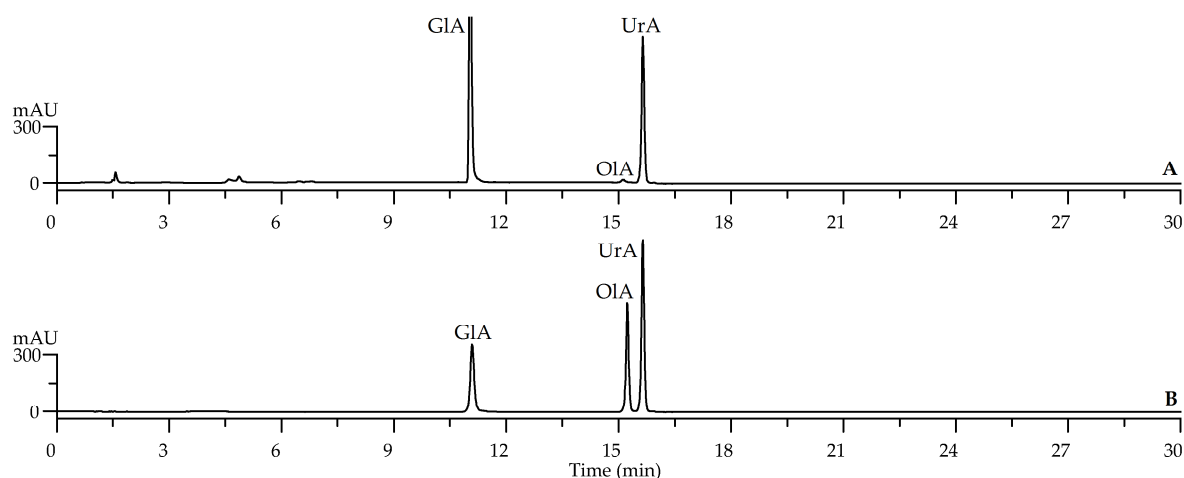

**Figure S2.** High-performance liquid chromatography with photodiode detection (HPLC-PDA) chromatograms of triterpenic acids of *R. adamsii* leaves (July sample, **A**) and reference standards (**B**). Sample preparation: The extract of *R. adamsii* (100 mg) was dissolved in 90% methanol (1 mL) followed by dilution of 20% methanol (8 mL), then centrifuged (6000 g, 15 min), and the supernatant was transferred in the volumetric flask (10 mL). Aliquot of internal standard (glycyrrhetic acid, 200  $\mu$ L; 1000  $\mu$ g/mL in methanol) was added to a volumetric flask and the final volume reached 10 mL with 25% methanol in the volumetric flask (solution A). Solution A (2 mL) was passed through polyamide SPE-cartridge and eluted with water (40 mL; solution B). Solution B was concentrate in a vacuum to dryness and 5 mL of 20% HCl in acetone was added. The mixture was boiled under a reflux 60 min and after cooling it was diluted to 20 mL and transferred into a separating funnel. Liquid-liquid extraction with ethyl acetate ( $3 \times 20$  mL) was used to separate triterpenic acid aglycones. The combined organic phase was concentrated in a vacuum and the dry residue was dissolved in 5 mL of methanol. The methanolic solution was passed through  $\text{Al}_2\text{O}_3$  SPE-cartridge, eluted with methanol (50 mL) followed with solvent removal in a vacuum, dissolving in 5 mL of methanol and HPLC-PAD analysis. Chromatographic conditions: liquid chromatograph LC-20 Prominence coupled with photodiode array detector SPD-M30A (all Shimadzu, Columbia, MD, USA) and column Acclaim<sup>TM</sup> C30 ( $4.6 \times 250$  mm, 5  $\mu$ m; Thermo Fisher Scientific, Sunnyvale, CA, USA); gradient elution; eluent A 1%  $\text{CH}_3\text{COONH}_3$  in water, eluent B MeCN-MeOH 3:1; flow rate: 1000  $\mu$ L/min; column temperature 30  $^\circ\text{C}$ ; sample volume 4  $\mu$ L; detection wavelength 190 nm. Glycyrrhetic acid (GLA) was used as an internal standard. Triterpenic acids were signed as OIA—oleanolic acid and UrA—ursolic acid.

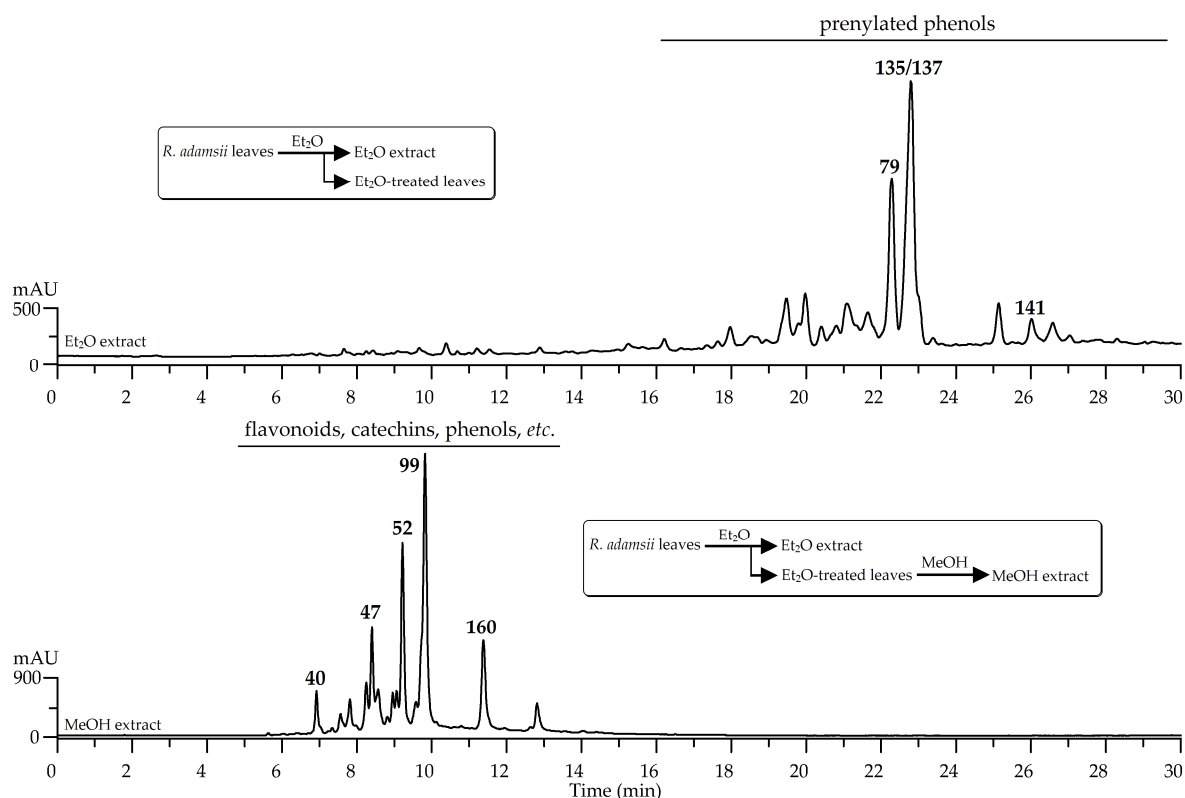

**Figure S3.** HPLC-PDA chromatograms of ether (Et<sub>2</sub>O) and methanolic (MeOH) extracts of fresh *R. adamsii* leaves (January sample). The basic peaks numbered as described in Table 2. Sample preparation: Intact fresh *R. adamsii* leaves (5 g) were rinsed (10 min) three times in Et<sub>2</sub>O (100 mL, each time; 20°C) and combined Et<sub>2</sub>O-extract was concentrated in vacuum to dryness. The leaves of *R. adamsii* after Et<sub>2</sub>O treatment were powdered and extracted with boiled MeOH twice (50 mL, each extraction) followed by concentration in vacuum to dryness to prepare MeOH-extract. Both extracts were dissolved in MeOH (ca. 5 mg in 1 mL), filtered through a 0.22-μm PTFE syringe filter before injection into the HPLC system. Chromatographic conditions used to separation of ethereal and methanolic extracts described in section 2.9 of Material and Methods.

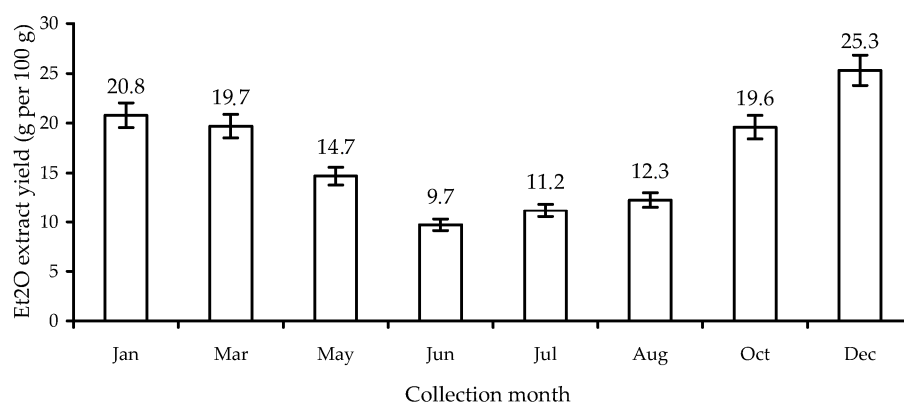

**Figure S4.** Yield of ether extract from *R. adamsii* leaves collected in various months. Sample preparation: Powdered *R. adamsii* leaves (1 g) were extracted three times with Et<sub>2</sub>O (30 mL, each time; 20°C) and combined Et<sub>2</sub>O-extract was concentrated in vacuum to dryness. The dry residue was weighted and the yield of ether extract was expressed as g per 100 g of dry leaves. All the analyses were carried out three times.
